# Supplementary material for: The MDT-15 Subunit of Mediator Interacts with Dietary Restriction to Modulate Longevity and Fluoranthene Toxicity in Caenorhabditis elegans
Source: PubMed Central journal article supplement (PMC3221695; doi:10.1371/journal.pone.0028036), 2011-11-21
Supplement: pone.0028036.s001.pdf [file pone.0028036.s001.pdf]

**Table S1 – Life span data from N2 animals treated with FLA.**

| Exp # | Strain | Treatment | Median | Mean +/- SEM   | p-value (vs DMSO treated) | N   |
|-------|--------|-----------|--------|----------------|---------------------------|-----|
| 1     | N2     | DMSO      |        |                |                           |     |
|       |        | Fed       | 20     | 20.05 +/- 0.66 | NA                        | 57  |
|       |        | DMSO BD   | 25     | 25.57 +/- 0.89 | NA                        | 117 |
|       |        | FLA Fed   | 9      | 9.00 +/- 0.25  | p>0.0001                  | 71  |
| 2     | N2     | FLA BD    | 6      | 6.48 +/- 0.14  | p>0.0001                  | 142 |
|       |        | DMSO      |        |                |                           |     |
|       |        | Fed       | 12     | 12.20 +/- 0.62 | NA                        | 63  |
|       |        | DMSO BD   | 18     | 17.30 +/- 0.86 | NA                        | 56  |
| 3     | N2     | FLA Fed   | 8      | 7.03 +/- 0.90  | p>0.0001                  | 61  |
|       |        | FLA BD    | 8      | 6.82 +/- 0.16  | p>0.0001                  | 136 |
|       |        | DMSO      |        |                |                           |     |
|       |        | Fed       | 17     | 19.03 +/- 0.65 | NA                        | 62  |
| Total | N2     | DMSO BD   | 20     | 21.00 +/- 1.07 | NA                        | 20  |
|       |        | FLA Fed   | 10     | 8.83 +/- 0.33  | p>0.0001                  | 40  |
|       |        | FLA BD    | 5      | 5.32 +/- 0.61  | p>0.0001                  | 77  |
|       |        | DMSO      |        |                |                           |     |
| Total | N2     | Fed       | 17     | 17.51 +/- 0.46 | NA                        | 176 |
|       |        | DMSO BD   | 21     | 22.06 +/- 0.69 | NA                        | 177 |
|       |        | FLA Fed   | 8      | 8.26 +/- 0.17  | p>0.0001                  | 184 |
|       |        | FLA BD    | 6      | 6.07 +/- 0.08  | p>0.0001                  | 359 |

Life span data from individual and pooled experiments. Statistical significance was evaluated by a Wilcoxon Rank-Sum test.
