# Supplementary material for: The MDT-15 Subunit of Mediator Interacts with Dietary Restriction to Modulate Longevity and Fluoranthene Toxicity in Caenorhabditis elegans
Source: PubMed Central journal article supplement (PMC3221695; doi:10.1371/journal.pone.0028036), 2011-11-21
Supplement: pone.0028036.s002.pdf [file pone.0028036.s002.pdf]

**Table S2 – Life span data from *eat-2(ad1116)* animals treated with FLA.**

| Exp # | Strain               | Treatment | Median | Mean +/- SEM   | p-value (vs DMSO treated) | N   |
|-------|----------------------|-----------|--------|----------------|---------------------------|-----|
| 4     | N2                   | DMSO Fed  | 18     | 19.69 +/- 0.97 | NA                        | 68  |
|       |                      | FLA Fed   | 8      | 8.17 +/- 0.32  | p>0.0001                  | 76  |
| 4     | <i>eat-2(ad1116)</i> | DMSO Fed  | 24     | 23.12 +/- 0.99 | NA                        | 33  |
|       |                      | FLA Fed   | 8      | 8.71 +/- 0.74  | p>0.0001                  | 14  |
| 5     | N2                   | DMSO Fed  | 21     | 21.01 +/- 0.7  | NA                        | 82  |
|       |                      | FLA Fed   | 7      | 8.34 +/- 0.33  | p>0.0001                  | 105 |
| 5     | <i>eat-2(ad1116)</i> | DMSO Fed  | 24     | 25.42 +/- 0.84 | NA                        | 45  |
|       |                      | FLA Fed   | 8      | 8.14 +/- 0.26  | p>0.0001                  | 106 |
| 6     | N2                   | DMSO Fed  | 15.5   | 16.21 +/- 0.67 | NA                        | 64  |
|       |                      | FLA Fed   | 9      | 7.91 +/- 0.22  | p>0.0001                  | 57  |
| 6     | <i>eat-2(ad1116)</i> | DMSO Fed  | 23     | 21.06 +/- 0.67 | NA                        | 48  |
|       |                      | FLA Fed   | 8      | 8.66 +/- 0.18  | p>0.0001                  | 49  |
| Total | N2                   | DMSO Fed  | 18     | 19.16 +/- 0.52 | NA                        | 181 |
|       |                      | FLA Fed   | 8      | 8.50 +/- 0.18  | p>0.0001                  | 237 |
| Total | <i>eat-2(ad1116)</i> | DMSO Fed  | 23     | 22.72 +/- 0.49 | NA                        | 139 |
|       |                      | FLA Fed   | 8      | 8.51 +/- 0.19  | p>0.0001                  | 173 |

Life span data from individual and pooled experiments. Statistical significance was evaluated by a Wilcoxon Rank-Sum test.
