# Supplementary material for: The MDT-15 Subunit of Mediator Interacts with Dietary Restriction to Modulate Longevity and Fluoranthene Toxicity in Caenorhabditis elegans
Source: PubMed Central journal article supplement (PMC3221695; doi:10.1371/journal.pone.0028036), 2011-11-21
Supplement: pone.0028036.s003.pdf [file pone.0028036.s003.pdf]

**Table S3 – Life span data from *daf-2(e1370)* and *daf-16(mu86)* animals treated with FLA.**

| Exp # | Strain              | Treatment | Median | Mean +/- SEM   | p-value (vs DMSO treated) | N   |
|-------|---------------------|-----------|--------|----------------|---------------------------|-----|
| 7     | N2                  | DMSO      |        |                |                           |     |
|       |                     | Fed       | 22     | 21.40 +/- 0.67 | NA                        | 61  |
|       |                     | FLA Fed   | 9      | 9.52 +/- 0.27  | p>0.0001                  | 46  |
|       |                     | DMSO      |        |                |                           |     |
| 7     | <i>daf-2(e1370)</i> | Fed       | 39     | 36.74 +/- 1.20 | NA                        | 79  |
|       |                     | FLA Fed   | 11     | 10.51 +/- 0.39 | p>0.0001                  | 88  |
|       |                     | DMSO      |        |                |                           |     |
|       |                     | Fed       | 16     | 11.76 +/- 0.41 | NA                        | 67  |
| 7     | <i>daf-16(mu86)</i> | FLA Fed   | 8      | 9.33 +/- 1.06  | p>0.0001                  | 78  |
|       |                     | DMSO      |        |                |                           |     |
| 8     | N2                  | Fed       | 18     | 17.93 +/- 0.74 | NA                        | 64  |
|       |                     | FLA Fed   | 6      | 6.30 +/- 0.28  | p>0.0001                  | 73  |
|       |                     | DMSO      |        |                |                           |     |
|       |                     | Fed       | 36     | 33.58 +/- 1.65 | NA                        | 51  |
| 8     | <i>daf-2(e1370)</i> | FLA Fed   | 9      | 8.39 +/- 0.25  | p>0.0001                  | 75  |
|       |                     | DMSO      |        |                |                           |     |
| 8     | <i>daf-16(mu86)</i> | Fed       | 15     | 14.97 +/- 0.50 | NA                        | 48  |
|       |                     | FLA Fed   | 8      | 7.24 +/- 0.21  | p>0.0001                  | 54  |
|       |                     | DMSO      |        |                |                           |     |
|       |                     | Fed       | 16     | 18.22 +/- 0.61 | NA                        | 78  |
| 9     | N2                  | FLA Fed   | 9      | 9.43 +/- 0.43  | p>0.0001                  | 56  |
|       |                     | DMSO      |        |                |                           |     |
| 9     | <i>daf-2(e1370)</i> | Fed       | 46     | 40.38 +/- 1.70 | NA                        | 77  |
|       |                     | FLA Fed   | 10     | 10.98 +/- 0.38 | p>0.0001                  | 79  |
|       |                     | DMSO      |        |                |                           |     |
|       |                     | Fed       | 14     | 15.25 +/- 0.33 | NA                        | 78  |
| 9     | <i>daf-16(mu86)</i> | FLA Fed   | 10     | 8.34 +/- 0.94  | p>0.0001                  | 78  |
|       |                     | DMSO      |        |                |                           |     |
| Total | N2                  | Fed       | 18     | 19.12 +/- 0.4  | NA                        | 203 |
|       |                     | FLA Fed   | 9      | 8.31 +/- 0.22  | p>0.0001                  | 175 |
|       |                     | DMSO      |        |                |                           |     |
|       |                     | Fed       | 41     | 37.41 +/- 0.98 | NA                        | 207 |
| Total | <i>daf-2(e1370)</i> | FLA Fed   | 9      | 10.00 +/- 0.22 | p>0.0001                  | 242 |
|       |                     | DMSO      |        |                |                           |     |
| Total | <i>daf-16(mu86)</i> | Fed       | 15     | 15.22 +/- 0.23 | NA                        | 193 |
|       |                     | FLA Fed   | 8      | 8.43 +/- 0.15  | p>0.0001                  | 210 |

Life span data from individual and pooled experiments. Statistical significance was evaluated by a Wilcoxon Rank-Sum test.
