# Supplementary material for: The MDT-15 Subunit of Mediator Interacts with Dietary Restriction to Modulate Longevity and Fluoranthene Toxicity in Caenorhabditis elegans
Source: PubMed Central journal article supplement (PMC3221695; doi:10.1371/journal.pone.0028036), 2011-11-21
Supplement: pone.0028036.s004.pdf [file pone.0028036.s004.pdf]

**Table S4 – Life span data from *mdt-15(tm2182)* animals treated with FLA.**

| Exp # | Strain                | Treatment | Median | Mean +/- SEM   | p-value (vs DMSO treated) | N   |
|-------|-----------------------|-----------|--------|----------------|---------------------------|-----|
| 1     | N2                    | DMSO      |        |                |                           |     |
|       |                       | Fed       | 20     | 20.05 +/- 0.66 |                           | 57  |
|       |                       | DMSO BD   | 25     | 25.57 +/- 0.89 |                           | 117 |
|       |                       | FLA Fed   | 9      | 9.00 +/- 0.25  | p>0.0001                  | 70  |
| 1     | <i>mdt-15(tm2183)</i> | FLA BD    | 6      | 6.48 +/- 0.14  | p>0.0001                  | 142 |
|       |                       | DMSO      |        |                |                           |     |
|       |                       | Fed       | 22     | 20.26 +/- 0.53 |                           | 62  |
|       |                       | DMSO BD   | 31     | 31.37 +/- 1.1  |                           | 107 |
| 10    | N2                    | FLA Fed   | 15     | 13.63 +/- 0.34 | p>0.0001                  | 73  |
|       |                       | FLA BD    | 16     | 16.91 +/- 0.36 | p>0.0001                  | 119 |
|       |                       | DMSO      |        |                |                           |     |
|       |                       | Fed       | 17     | 19.03 +/- 0.65 | NA                        | 62  |
| 10    | <i>mdt-15(tm2183)</i> | DMSO BD   | 20     | 21.00 +/- 1.07 | NA                        | 20  |
|       |                       | FLA Fed   | 10     | 8.83 +/- 0.33  | p>0.0001                  | 40  |
|       |                       | FLA BD    | 5      | 5.32 +/- 0.61  | p>0.0001                  | 77  |
|       |                       | DMSO      |        |                |                           |     |
| 10    | <i>mdt-15(tm2183)</i> | Fed       | 20     | 18.8 +/- 0.93  | NA                        | 41  |
|       |                       | DMSO BD   | 27     | 26.91 +/- 1.09 | NA                        | 58  |
|       |                       | FLA Fed   | 15     | 13.89 +/- 0.35 | p>0.0001                  | 74  |
|       |                       | FLA BD    | 15     | 14.41 +/- 0.37 | p>0.0001                  | 58  |
| Total | N2                    | DMSO      |        |                |                           |     |
|       |                       | Fed       | 20     | 20.39 +/- 0.54 | NA                        | 119 |
|       |                       | DMSO BD   | 23     | 24.87 +/- 0.78 | NA                        | 137 |
|       |                       | FLA Fed   | 9      | 8.94 +/- 0.22  | p>0.0001                  | 90  |
| Total | <i>mdt-15(tm2183)</i> | FLA BD    | 6      | 6.08 +/- 0.10  | p>0.0001                  | 219 |
|       |                       | DMSO      |        |                |                           |     |
|       |                       | Fed       | 20.5   | 19.69 +/- 0.49 | NA                        | 103 |
|       |                       | DMSO BD   | 30     | 29.81 +/- 0.84 | NA                        | 165 |
| Total | <i>mdt-15(tm2183)</i> | FLA Fed   | 15     | 13.76 +/- 0.25 | p>0.0001                  | 141 |
|       |                       | FLA BD    | 16     | 16.10 +/- 0.28 | p>0.0001                  | 177 |

Life span data from individual and pooled experiments. Statistical significance was evaluated by a Wilcoxon Rank-Sum test.
